# Supplementary material
Source: HighWire-hosted journal article supplement (https://jnm.snmjournals.org/highwire/filestream/108841/field_highwire_adjunct_files/0/263453_Supplemental_Data.pdf)
Supplement: 263453_Supplemental_Data.pdf [file 263453_Supplemental_Data.pdf]

1 **Supplemental Table 1. I.v., i.p., and s.c. injection led to near equivalent organ**  
 2 **biodistribution of radioligands in healthy mice.** Healthy mice were injected with  
 3  $^{68}\text{Ga}$ -DOTATOC,  $^{68}\text{Ga}$ -PSMA11, or  $^{68}\text{Ga}$ -FAPI46, respectively. Absolute organ uptake is given as  
 4 %IA/g at 1h and 4h p.i. (*in vivo* PET), and 5h p.i. (*ex vivo* gamma counter). Data represent mean  
 5 %IA/g $\pm$ SEM of  $n=6$  mice/group. \* $p<0.05$ ; \*\* $p<0.01$ .

| $^{68}\text{Ga}$ -DOTATOC |                |                 |                |                          |                          |
|---------------------------|----------------|-----------------|----------------|--------------------------|--------------------------|
|                           | i.v.           | i.p.            | s.c.           | p-value<br>i.v. vs. i.p. | p-value<br>i.v. vs. s.c. |
| blood<br>1h               | 1.3 $\pm$ 0.3  | 1.0 $\pm$ 0.1   | 1.1 $\pm$ 0.1  | 0.7589                   | 0.8431                   |
| blood<br>4h               | 0.3 $\pm$ 0.1  | 0.2 $\pm$ 0.02  | 0.2 $\pm$ 0.04 | 0.5639                   | 0.8229                   |
| kidneys<br>1h             | 6.0 $\pm$ 1.0  | 6.2 $\pm$ 0.4   | 5.6 $\pm$ 0.5  | 0.9965                   | 0.9837                   |
| kidneys<br>4h             | 3.9 $\pm$ 0.7  | 4.3 $\pm$ 0.2   | 5.9 $\pm$ 0.5  | 0.9393                   | 0.1658                   |
| $^{68}\text{Ga}$ -PSMA11  |                |                 |                |                          |                          |
|                           | i.v.           | i.p.            | s.c.           | p-value<br>i.v. vs. i.p. | p-value<br>i.v. vs. s.c. |
| blood<br>1h               | 1.6 $\pm$ 0.1  | 1.0 $\pm$ 0.1   | 1.1 $\pm$ 0.1  | $p=0.0226^*$             | $p=0.0880^*$             |
| blood<br>4h               | 0.9 $\pm$ 0.1  | 0.5 $\pm$ 0.1   | 0.3 $\pm$ 0.04 | $p=0.0394^*$             | $p=0.0065^{**}$          |
| kidneys<br>1h             | 22.4 $\pm$ 3.2 | 24.4 $\pm$ 0.9  | 19.7 $\pm$ 2.0 | $p=0.9279$               | $p=0.8773$               |
| kidneys<br>4h             | 14.9 $\pm$ 1.4 | 20.8 $\pm$ 2.8  | 16.1 $\pm$ 1.5 | $p=0.3040$               | $p=0.9251$               |
| $^{68}\text{Ga}$ -FAPI46  |                |                 |                |                          |                          |
|                           | i.v.           | i.p.            | s.c.           | p-value<br>i.v. vs. i.p. | p-value<br>i.v. vs. s.c. |
| blood<br>1h               | 1.2 $\pm$ 0.6  | 0.8 $\pm$ 0.4   | 0.8 $\pm$ 0.3  | $p=0.9505$               | $p=0.9345$               |
| blood<br>4h               | 0.2 $\pm$ 0.02 | 0.02 $\pm$ 0.01 | 0.1 $\pm$ 0.03 | $p=0.0036^{**}$          | $p=0.5326$               |
| kidneys<br>1h             | 4.9 $\pm$ 1.6  | 8.7 $\pm$ 1.7   | 3.1 $\pm$ 1.2  | $p=0.5065$               | $p=0.8014$               |
| kidneys<br>4h             | 1.1 $\pm$ 0.2  | 3.8 $\pm$ 2.3   | 1.3 $\pm$ 0.2  | $p=0.6694$               | $p=0.9513$               |

6

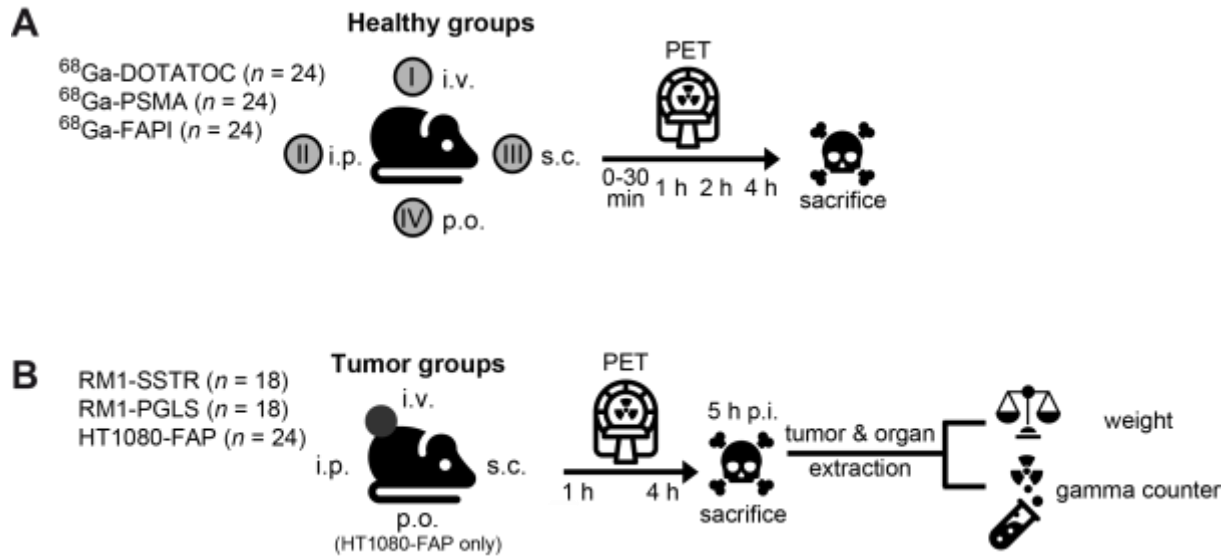

8

9 **Supplemental Figure 1. Experimental design.** (A) Healthy mice ( $n=6/\text{group}$ ) underwent PET  
 10 scans following i.v., i.p., s.c., and p.o. radioligand application, respectively, at minute 0-30 after  
 11 start of PET and after 1h, 2h and 4h with subsequent sacrifice of animals. (B) Mice with  
 12 subcutaneous RM1-SSTR, RM1-PSMA, or HT1080-FAP tumors ( $n=6/\text{group}$ ) with i.v., i.p. and s.c.  
 13 application of  $^{68}\text{Ga}$ -DOTATOC,  $^{68}\text{Ga}$ -PSMA11, or (C)  $^{68}\text{Ga}$ -FAPI46, respectively underwent PET  
 14 scans after 1h and 4h, followed by sacrifice (5h) and subsequent assessment of radioactivity in  
 15 organs and tumors by gamma counter.

16

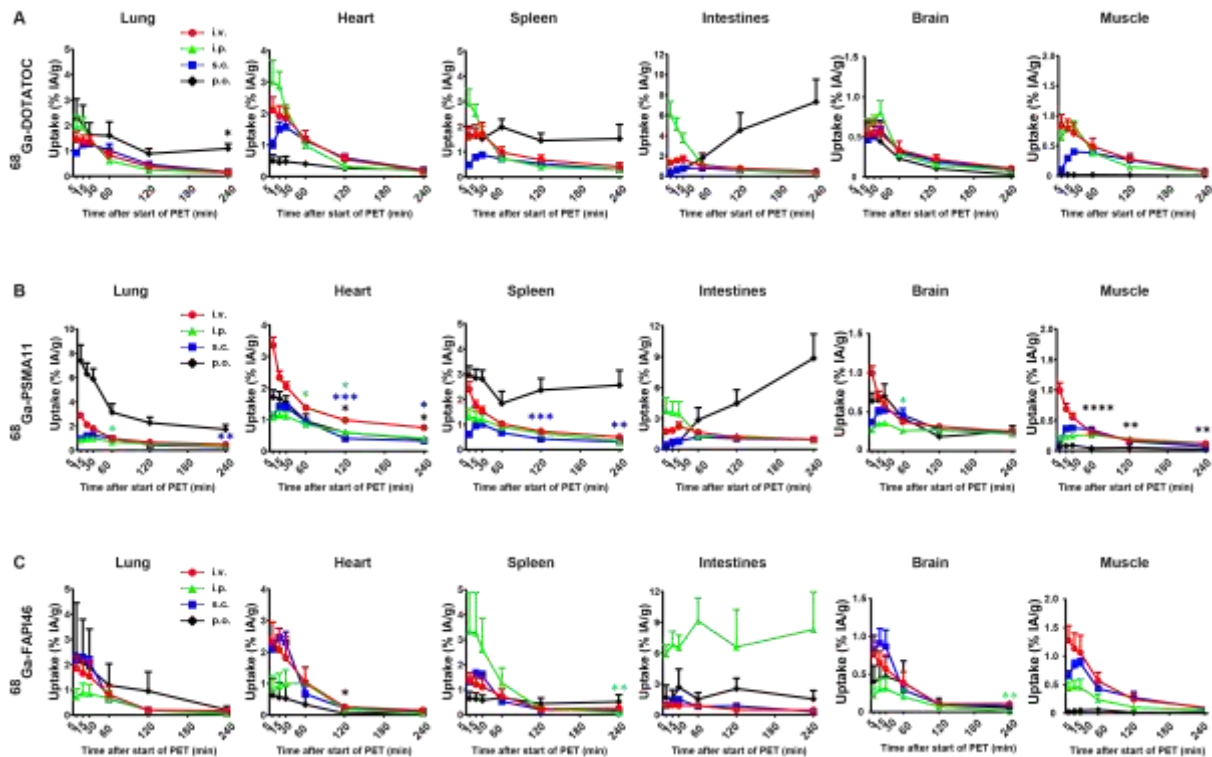

17  
 18 **Supplemental Figure 2. Near equivalent radioligand organ biodistribution for i.p. and s.c.**  
 19 **compared to i.v. injection in healthy mice.** *In vivo* PET biodistribution of  $^{68}\text{Ga}$ -ligands in healthy  
 20 mice ( $n=6/\text{group}$ ). PET scans with (A)  $^{68}\text{Ga}$ -DOTATOC, (B)  $^{68}\text{Ga}$ -PSMA11, and (C)  $^{68}\text{Ga}$ -FAPI46.  
 21 Time-activity curves illustrate radioligand dynamics in selected organ VOIs at indicated time points  
 22 for i.v., i.p., s.c., and p.o. application. Data are shown as mean+SEM. %IA/g: percent of the  
 23 injected activity per gram. Asterisks indicate significance compared to i.v. application route.  
 24 \* $p < 0.05$ ; \*\* $p < 0.01$ ; \*\*\* $p < 0.001$ ; \*\*\*\* $p < 0.0001$ .

25  
 26

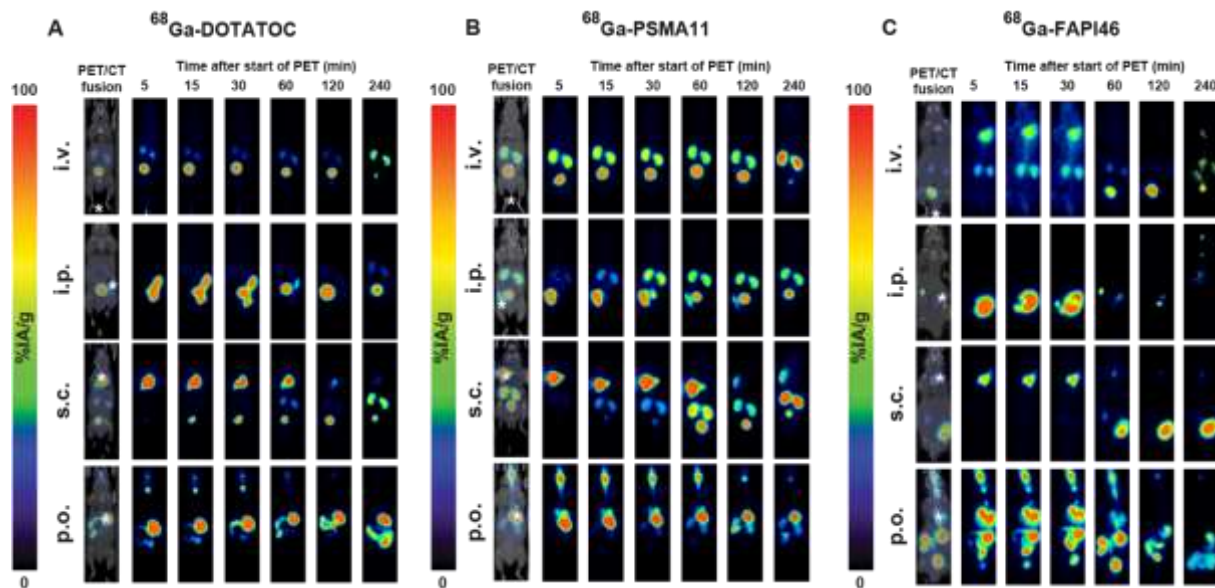

27  
 28 **Supplemental Figure 3. PET biodistribution of  $^{68}\text{Ga}$ -ligands in healthy mice.** Whole body  
 29 maximum intensity projections of one representative mouse out of  $n=6/\text{group}$  for each application  
 30 route after injection of  $^{68}\text{Ga}$ -labelled ligands. (A)  $^{68}\text{Ga}$ -DOTATOC, (B)  $^{68}\text{Ga}$ -PSMA11, and  
 31 (C)  $^{68}\text{Ga}$ -FAPI46 after i.v., i.p., s.c., and p.o. application in healthy mice. Asterisks indicate the  
 32 injection site.

33

34

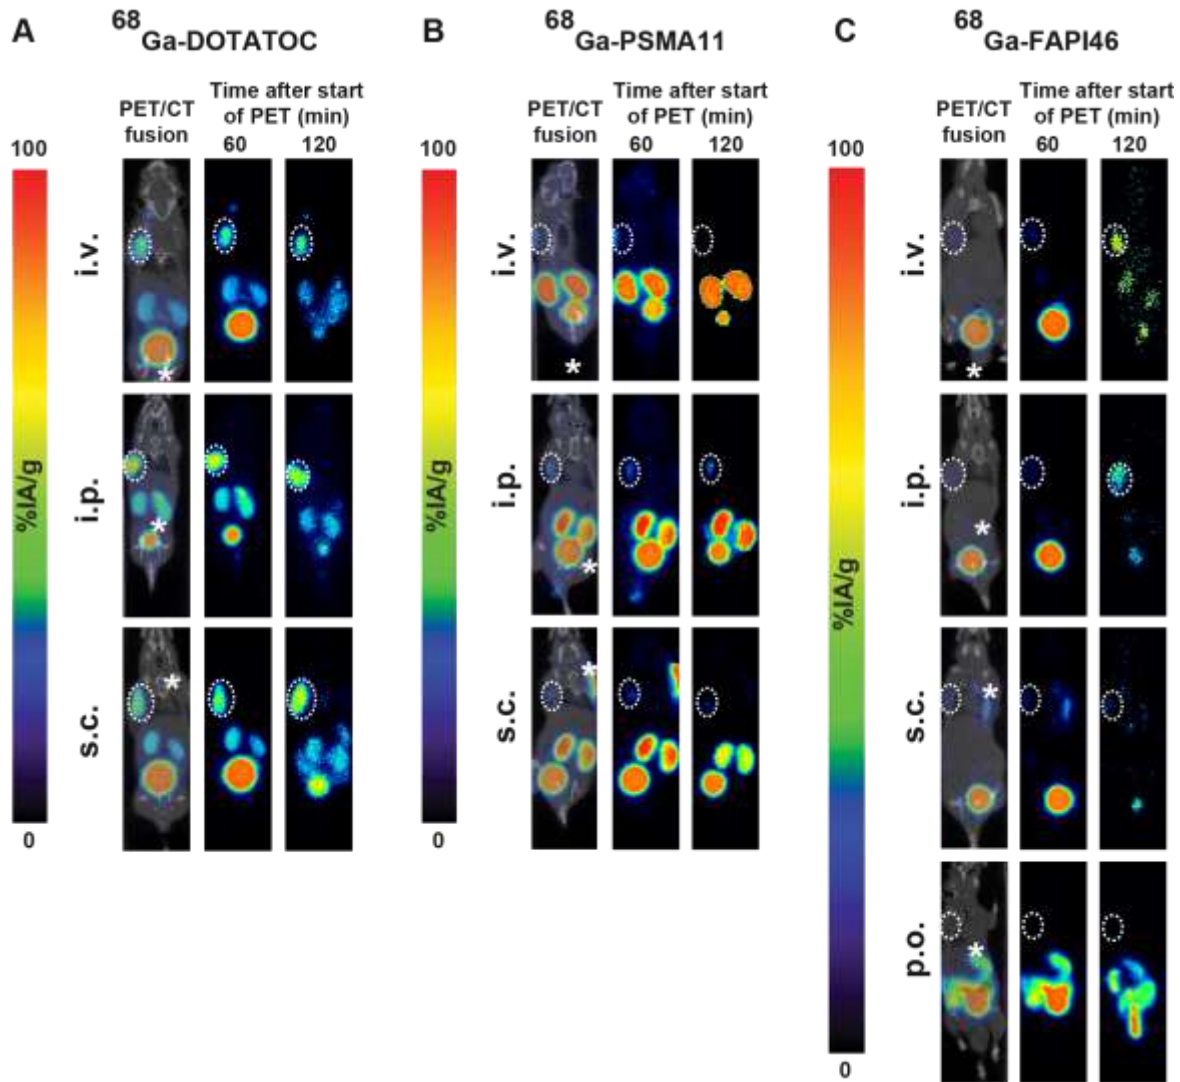

36  
37 **Supplemental Figure 4. PET biodistribution of  $^{68}\text{Ga}$ -ligands in tumor-bearing mice.** Whole  
38 body maximum intensity projections of one representative mouse out of  $n=6$ /group for each  
39 application route 1h and 4h after injection of  $^{68}\text{Ga}$ -labelled ligands. (A)  $^{68}\text{Ga}$ -DOTATOC, (B)  
40  $^{68}\text{Ga}$ -PSMA11, and (C)  $^{68}\text{Ga}$ -FAPI46 via i.v., i.p., and s.c. application in RM1-SSTR-, RM1-PSMA-  
41 , or HT1080-FAP-tumor-bearing mice with additional p.o. application, respectively. Asterisks  
42 indicate the injection site; dashed circles indicate subcutaneous tumor in the right shoulder region.

43

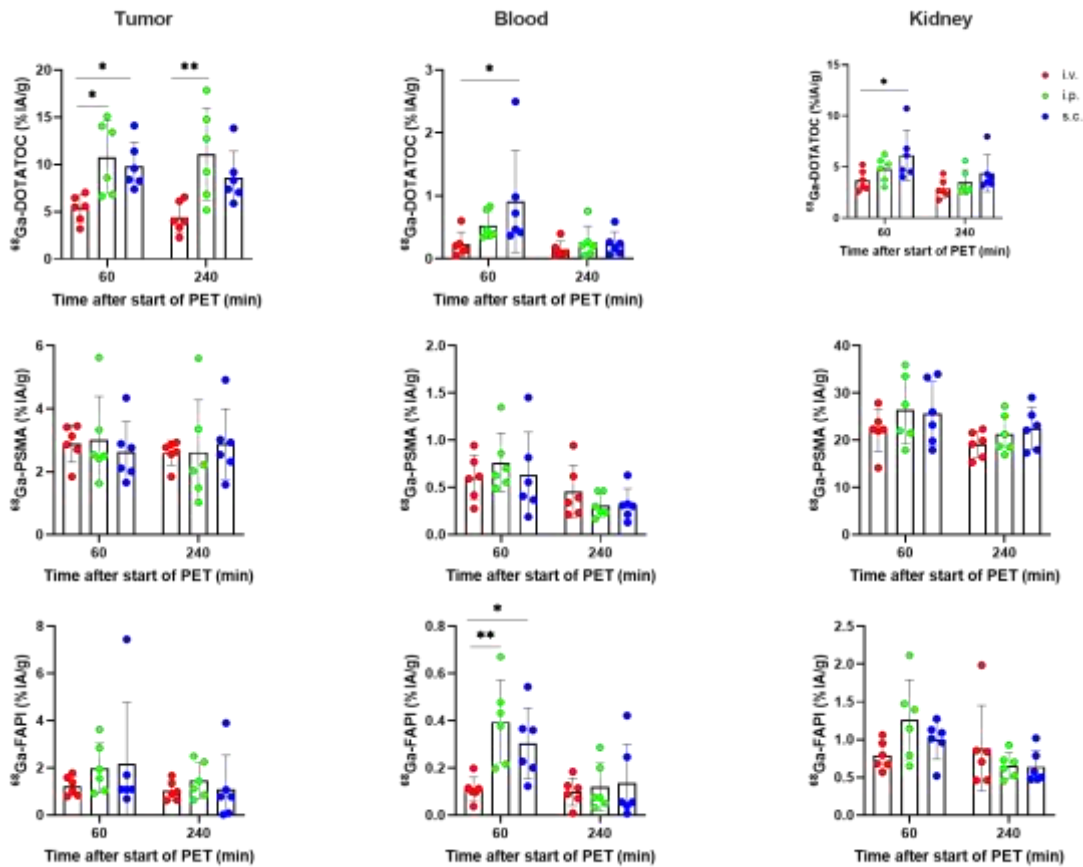

45

46 **Supplemental Figure 5. PET biodistribution of  $^{68}\text{Ga}$ -ligands in tumor-bearing mice.** *In vivo*  
 47 PET uptake of  $^{68}\text{Ga}$ -ligands in tumor-bearing mice ( $n=6/\text{group}$ ). after  $^{68}\text{Ga}$ -DOTATOC,  $^{68}\text{Ga}$ -  
 48 PSMA11, and  $^{68}\text{Ga}$ -FAPI46. Bars illustrate radioligand uptake in selected organ VOIs at indicated  
 49 time points for i.v., i.p., and s.c. application. Data are shown as mean  $\pm$  SD. %IA/g: percent of the  
 50 injected activity per gram. Asterisks indicate significance compared to i.v. application route.  
 51 \* $p < 0.05$ ; \*\* $p < 0.01$ .

52

53

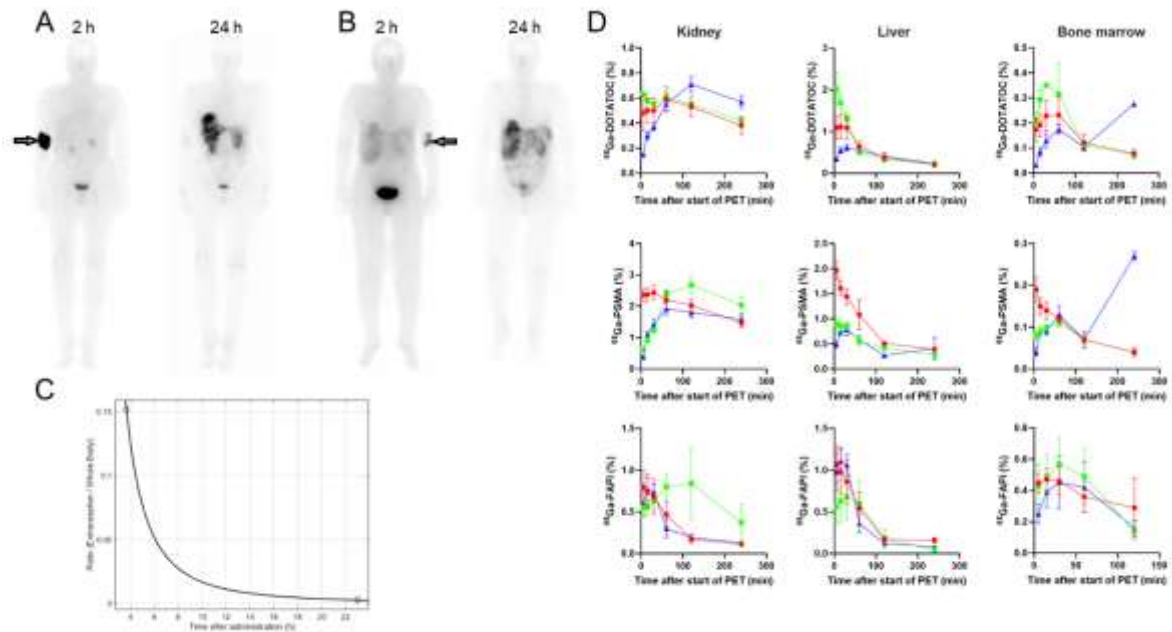

54

55 **Supplemental Figure 6.** Anterior whole-body planar images of <sup>177</sup>Lu-DOTATOC distribution 2h  
56 and 24h after paravenous infusion (arrow) of the radioligand in two patients (A and B). Radioligand  
57 absorption in patient A occurs with a half-life of 3.3 hours (C). Extrapolation from mice to humans  
58 suggests comparable biodistribution of <sup>68</sup>Ga-radioligands in healthy organs (D). Data are shown  
59 as mean±SEM.
